# Supplementary material for: Exploring early-stage orienting behavior using an eye tracker for attention deficit hyperactivity disorder classification
Source: Research Square preprint supplement (doi:10.21203/rs.3.rs-7191610/v1), 2025-09-01
Supplement: Supplementary file [file beb3edb1d3a0c8f97135c35a.pdf]

**Table 1. Definition of features extracted from behavior and eye tracking data.**

| <b>Feature</b>               | <b>Description</b>                                                                                                                     |
|------------------------------|----------------------------------------------------------------------------------------------------------------------------------------|
| <b>Behavioral feature</b>    |                                                                                                                                        |
| Accuracy                     | Number of button presses on the same position with the target                                                                          |
| Reaction time (RT)           | Duration from target appearance to pushing the button                                                                                  |
| SD of RT                     | Standard deviation of the reaction time across trials                                                                                  |
| <b>Eye movement features</b> |                                                                                                                                        |
| Fixation duration            | Fixation on cue stimuli in the area of interest before target appearance                                                               |
| SD of fixation locations     | Standard deviation of fixation locations during the target detection period                                                            |
| Saccade velocity             | Saccade velocity before target appearance                                                                                              |
| Number of saccades           | Total number of saccades during the target detection period                                                                            |
| Saccade velocity             | Saccade velocity during the target detection period                                                                                    |
| Saccade length               | Total length of saccade movement during the target detection period                                                                    |
| Rate of null data            | The rate of null samples across all eye tracker data                                                                                   |
| SD of null rate              | Standard deviation of the rate of null data                                                                                            |
| Rate of joint attention (JA) | Number of joint attention occurrences                                                                                                  |
| GCE in saccade number        | GCE calculated by the difference between congruent and incongruent conditions of the saccade number during the target detection period |
| GCE in RT                    | GCE calculated by the difference between congruent and incongruent conditions of the RT during the target detection period             |
| Rate of peripheral vision    | Number of peripheral observations of target appearance                                                                                 |

**Table 2 Correlations between the KARS score and each feature selected for logistic regression.**

| Category   | Indicators                                      | 1                   | 2                   | 3     | 4                   | 5                   | 6                    | 7                    | 8                  | 9                  | 10                  |                     |                     |
|------------|-------------------------------------------------|---------------------|---------------------|-------|---------------------|---------------------|----------------------|----------------------|--------------------|--------------------|---------------------|---------------------|---------------------|
| KARS score | 1. Inattention                                  |                     |                     |       |                     |                     |                      |                      |                    |                    |                     |                     |                     |
|            | 2. Hyperactivity                                | 0.84 <sup>***</sup> |                     |       |                     |                     |                      |                      |                    |                    |                     |                     |                     |
| Social     | 3. Rate of JA (0.25-s SOA/cong)                 | -0.3 <sup>**</sup>  | -0.21               |       |                     |                     |                      |                      |                    |                    |                     |                     |                     |
|            | 4. GCE in the number of saccades (0.5-s SOA)    | 0.35 <sup>**</sup>  | 0.35 <sup>**</sup>  | -0.2  |                     |                     |                      |                      |                    |                    |                     |                     |                     |
|            | 5. JA score in the RT (0.5-s SOA)               | -0.02               | -0.02               | -0.25 | 0.61 <sup>***</sup> |                     |                      |                      |                    |                    |                     |                     |                     |
|            | 6. Number of saccades (0.25-s SOA/cong)         | -0.23               | -0.11               | 0.14  | -0.0                | -0.04               |                      |                      |                    |                    |                     |                     |                     |
|            | 7. Duration of each fixation point              | 0.46 <sup>**</sup>  | 0.36 <sup>**</sup>  | -0.22 | -0.01               | 0.09                | -0.66 <sup>***</sup> |                      |                    |                    |                     |                     |                     |
| Nonsocial  | 8. Number of saccades (0.25-s SOA/incong)       | -0.39 <sup>**</sup> | -0.35 <sup>**</sup> | 0.24  | -0.12               | 0.09                | 0.68 <sup>***</sup>  | -0.49 <sup>***</sup> |                    |                    |                     |                     |                     |
|            | 9. SD of fixation locations (0.25-s SOA/incong) | -0.23               | -0.1                | 0.09  | 0.04                | -0.09               | 0.37 <sup>**</sup>   | -0.45 <sup>**</sup>  | 0.33 <sup>**</sup> |                    |                     |                     |                     |
|            | 10. null_rate (0.5-s SOA/incong)                | 0.36 <sup>**</sup>  | 0.24                | -0.11 | 0.17                | 0.28                | -0.14                | 0.54 <sup>***</sup>  | -0.05              | -0.17              |                     |                     |                     |
|            | 11. Accuracy (0.25-s SOA/incong)                | -0.29               | -0.17               | 0.08  | -0.27               | -0.35 <sup>**</sup> | 0.13                 | -0.17                | 0.06               | 0.47 <sup>**</sup> | -0.03               |                     |                     |
| Both       | 12. Rate of nulls                               | 0.33 <sup>**</sup>  | 0.24                | -0.07 | 0.18                | 0.26                | 0.04                 | 0.33 <sup>**</sup>   | 0.01               | -0.26              | 0.77 <sup>***</sup> | -0.17               |                     |
|            | 13. Variance of RT                              | 0.27                | 0.32 <sup>**</sup>  | -0.09 | 0.28                | 0.39 <sup>**</sup>  | 0.36 <sup>**</sup>   | 0.0                  | 0.26               | -0.1               | 0.36 <sup>**</sup>  | -0.5 <sup>***</sup> | 0.63 <sup>***</sup> |

JA: Joint attention; SOA: stimulus onset asynchrony; RT: reaction time; SD: standard deviation; cong/incong: congruent cue/incongruent cues.

<sup>\*\*</sup> indicates correlation is significant with  $p < .01$

<sup>\*\*\*</sup> indicates correlation is significant with  $p < .001$
